# Supplementary material
Source: publisher site journal article supplement (https://www.dovepress.com/article/225208)
Supplement: Supplementary file 1 [file get_supplementary_file.php]

**Appendix 1**

Please fill in the following details, all of which shall be kept confidential.

Name: Date:

Profession: Department:

Age: Gender: Male Female

Working experience: Qualification (Highest degree obtained):

1. The best feature of the workshop

…………………………………………………………………………………………………………………………..

…………………………………………………………………………………………………………………………..

…………………………………………………………………………………………………………………………..

1. Dissatisfaction about the workshop

…………………………………………………………………………………………………………………………..

…………………………………………………………………………………………………………………………..

…………………………………………………………………………………………………………………………..

1. Recommendations for improving forthcoming workshops

…………………………………………………………………………………………………………………………..

…………………………………………………………………………………………………………………………..

…………………………………………………………………………………………………………………………..

**Appendix 2: Quantitative analysis**

| **Socio-demographic Characteristics** | **Number (n) =64** | **Percentage (%)** |
| --- | --- | --- |
| Gender  Females  Males  Age group  20-25  26-30  31-35  36-40  Professional categories  Doctors  Nurses  Pharmacists  Microbiologist  Medical Laboratory Technologist  Medical Laboratory Technician  Patient Admission Counselor  Support staff  Departments and Units  Pharmacy  Clinical Pharmacy  Clinical Pharmacology  Surgical Oncology  Pathology  Intensive Care  Medical Oncology  Radiation Oncology  Dentistry  Emergency Medicine  Gynecology  Infection Control  Support Services  Patient Counseling | 44  20  14  32  10  8  14  25  19  2  1  1  1  1  17  2  2  10  9  6  5  4  2  2  2  1  1  1 | 68.7  31.3  21.9  50  15.6  12.5  21.9  39.1  29.6  3.1  1.6  1.6  1.6  1.6  26.6  3.1  3.1  15.6  14.1  9.3  7.8  6.2  3.1  3.1  3.1  1.5  1.5  1.5 |
